# Supplementary material for: The Maximal Oxygen Uptake Verification Phase: a Light at the End of the Tunnel?
Source: Springer Nature journal article supplement (doi:10.1186/s40798-017-0112-1), 2017-12-01
Supplement: MOESM1 [file 24443036]

**Table S1.** Incidence of  $\dot{V}O_{2max}$  deemed valid based on the verification phase as well as phase duration and method employed for comparison between phases along other criteria employed.

| Reference               | n                  | Training status                   | Percentage of subjects who achieved criteria |                 |                 |              |       | Phase duration | Comparison between incremental and verification phase $\dot{V}O_{2max}$ |                                                                 |
|-------------------------|--------------------|-----------------------------------|----------------------------------------------|-----------------|-----------------|--------------|-------|----------------|-------------------------------------------------------------------------|-----------------------------------------------------------------|
|                         |                    |                                   | $\dot{V}O_2$ plateau                         | RER $\geq$ 1.15 | RER $\geq$ 1.10 | HR (220-age) | [LAC] |                |                                                                         | Verification phase                                              |
| Niemelä et al. [16]     | 16 men             | Not reported                      | 12.5%                                        | 37.5%           | -               | 31.3%        | -     | 56.3%          | ~13.1 min;<br>13.3 min                                                  | Mean                                                            |
| Stachenfeld et al. [67] | 33 men<br>18 women | Not reported                      | 88.0%                                        | -               | -               | -            | -     | 88.0%          | Not reported                                                            | Mean; difference $\leq$ 150 ml.min <sup>-1</sup> between phases |
| Day et al. [28]         | 71 men             | Not reported                      | 17.0%                                        | -               | -               | -            | -     | 100%           | ~4-10 min                                                               | Mean                                                            |
| Midgley et al. [35]     | 16 men             | Long- and middle-distance runners | 50.0%                                        | -               | 81.3%           | 81.3%        | -     | 87.5%          | ~2.8 min                                                                | Difference $\leq$ 2% between phases*                            |
|                         | 16 men             |                                   | 50.0%                                        | -               | 68.8%           | 75.0%        | -     | 75.0%          | ~2.9 min                                                                | Difference $\leq$ 2% between phases*                            |
| Rossiter et al. [29]    | 7 men              | Not reported                      | 0%                                           | ~50.0%          | -               | ~100%        | -     | 100%           | ~1.5 min                                                                | Mean                                                            |
|                         |                    | Not reported                      | 0%                                           | ~50.0%          | -               | ~100%        | -     | 100%           | ~2.2 min                                                                | Mean                                                            |
| Midgley et al. [37]     | 9 men              | Distance runners                  | -                                            | -               | -               | -            | -     | ~100%          | Not reported                                                            | Mean                                                            |
|                         |                    |                                   | -                                            | -               | -               | -            | -     | ~100%          | Not reported                                                            | Mean                                                            |
|                         |                    |                                   | -                                            | -               | -               | -            | -     | ~100%          | Not reported                                                            | Mean                                                            |
| Hawkins et al. [32]     | 52 men             | Well-trained distance runners     | -                                            | -               | -               | -            | -     | 100%           | at least 2.3 min                                                        | Mean*                                                           |

|                                  |                    |                                        |       |       |       |       |       |       |                    |                                                                                                       |
|----------------------------------|--------------------|----------------------------------------|-------|-------|-------|-------|-------|-------|--------------------|-------------------------------------------------------------------------------------------------------|
| Foster et al. [51]               | 16 men<br>4 women  | Physically active                      | -     | -     | -     | -     | -     | 100%  | ~1.5-3 min         | Mean                                                                                                  |
|                                  | 12 men<br>8 women  | Cross-country trackers and triathletes | -     | -     | -     | -     | -     | 100%  | ~1.5-3 min         | Mean                                                                                                  |
| Poole et al. [17]                | 8 men              | Recreationally trained                 | 62.5% | 87.5% | 87.5% | 62.5% | 25.0% | 100%  | Not reported       | Mean*                                                                                                 |
| Astorino et al. [31]             | 6 men<br>9 women   | Sedentary                              | -     | ~100% | ~100% | -     | -     | 87.0% | ~4.2 min           | Mean                                                                                                  |
|                                  | 1 men<br>8 women   | Sedentary                              | -     | ~100% | ~100% | -     | -     | 67.0% | ~3.7 min           |                                                                                                       |
| Midgley et al. [36]              | 10 men             | Cyclists                               | 80.0% | 100%  | 100%  | 90.0% | 90.0% | 90.0% | ~4.7 min           | Difference > 50% between measured and modelled verification phase $\dot{V}O_{2max}$                   |
|                                  | 10 men             | Runners                                | 70.0% | 40.0% | 90.0% | 80.0% | 40.0% | 90.0% | ~4.5 min           |                                                                                                       |
| Astorino & White [61]            | 13 men<br>17 women | Physically active                      | -     | -     | 100%  | -     | -     | 76.7% | ~2.1 min           | Mean; difference $\leq$ 2% between phases*                                                            |
| Wood et al. [68]                 | 67 men<br>68 women | Sedentary overweight and obese         | 46.0% | 89.0% | -     | 83.0% | 70.0% | 84.4% | Not reported       | Difference < 50% between incremental and verification phases $\dot{V}O_{2max}$ based on ACSM equation |
| Kirkeberg et al. [41]            | 12 men             | Recreationally trained                 | -     | -     | 58.3% | 92.0% | -     | 100%  | ~2.8 min           | Mean*                                                                                                 |
|                                  |                    |                                        | -     | -     | 75.0% | 92.0% | -     | 100%  | ~3.1 min           |                                                                                                       |
|                                  |                    |                                        | -     | -     | 25.0% | 92.0% | -     | 100%  | ~3.5 min           |                                                                                                       |
| Scharhag-Rosenberger et al. [40] | 20 men<br>20 women | Not reported                           | 30.0% | -     | 20.0% | 76.0% | 78.0% | 95.0% | ~2.1 min; ~2.4 min | Mean; difference $\leq$ 5.5% between phases*                                                          |

|                      |                   |                                          |       |       |       |       |       |        |                |                                                                                          |
|----------------------|-------------------|------------------------------------------|-------|-------|-------|-------|-------|--------|----------------|------------------------------------------------------------------------------------------|
| Bowen et al. [64]    | 24 men            | Chronic heart failure patients           | -     | -     | 75.0% | -     | -     | 58.0%  | ~2 min         | Mean; individual comparison with non-paired <i>t</i> -test                               |
| Beltrami et al. [69] | 23 men<br>3 women | Cross-country skiers and runners         | 69.2% | -     | -     | -     | -     | 92.3%  | Not reported   | Mean; difference $\leq 123 \pm 18$ ml.min <sup>-1</sup> O <sub>2</sub> between stages*   |
| Leicht et al. [52]   | 8 men             | Wheelchair Rugby Players                 | 31.3% | 75.0% | 81.3% | -     | 44.0% | 100%   | ~1-3.7 min     | Mean*                                                                                    |
|                      | 8 men             | Wheelchair Basketball Players            | 37.5% | 100%  | 100%  | 87.5% | 93.8% | 100%   |                |                                                                                          |
|                      | 8 men             | Wheelchair Basketball and Tennis Players | 50.0% | 75.0% | 93.8% | 43.8% | 93.8% | 100%   |                |                                                                                          |
| Mier et al. [24]     | 8 men 27 women    | College athletes                         | 14.0% | 69.0% | 91.0% | 83.0% | -     | 60-80% | at least 4 min | Difference $\leq 2.2$ and $\leq 2$ ml.kg <sup>-1</sup> .min <sup>-1</sup> O <sub>2</sub> |
| Dalleck et al. [50]  | 9 men<br>9 women  | Middle-aged and Older Adults             | -     | -     | -     | -     | -     | 88.9%  | ~2.6 min       | Mean; difference $\leq 3\%$ between phases*                                              |
| Saynor et al. [45]   | 10 men<br>4 women | Cystic fibrosis patients                 | 7.1%  | 100%  | 100%  | 21.2% | 71.4% | 79.0%  | ~1.2 min       | Mean; difference $\leq 9\%$ between phases                                               |
| Sedgeman et al. [42] | 6 men<br>7 women  | Recreationally trained                   | 100%  | -     | -     | -     | -     | 76.9%  | ~2.2 min       | Mean; difference $\leq 3\%$ between phases*                                              |
|                      |                   |                                          | 69.2% | -     | -     | -     | -     | 76.9%  | ~1.3 min       |                                                                                          |
| Nolan et al. [44]    | 6 men<br>7 women  | Physically active                        | -     | -     | -     | -     | -     | 100%   | ~5.3 min       | Mean; difference $\leq 3\%$ between phases*                                              |
|                      |                   |                                          | -     | -     | -     | -     | -     | 100%   | ~5.2 min       |                                                                                          |

|                        |                   |                                                               |       |   |       |       |       |       |              |                                                                                                                               |
|------------------------|-------------------|---------------------------------------------------------------|-------|---|-------|-------|-------|-------|--------------|-------------------------------------------------------------------------------------------------------------------------------|
|                        |                   |                                                               | -     | - | -     | -     | -     | 66.7% | ~4.5 min     |                                                                                                                               |
|                        |                   |                                                               | -     | - | -     | -     | -     | 58.3% | ~4.4 min     |                                                                                                                               |
| Straub et al. [48]     | 12 men<br>4 women | Trained cyclists                                              | 18.8% | - | 37.5% | 37.5% | 87.5% | 94.0% | Not reported | Difference $\leq$ 150 ml.min <sup>-1</sup> O <sub>2</sub>                                                                     |
| Sawyer et al. [53]     | 10 men<br>9 women | Sedentary obese                                               | -     | - | -     | -     | -     | 31.6% | ~1.9 min     | Mean; difference greater than 2% between phases*                                                                              |
| Scheidler & Devor [70] | 13 subjects       | Trained endurance runners                                     | -     | - | -     | -     | -     | 92.3% | ~2.5 min     | Difference $\leq$ 50 ml.min <sup>-1</sup> between phases                                                                      |
| Colakoglu et al. [71]  | 9 men             | Mildly- to well-trained cyclists and track and field athletes | -     | - | -     | -     | -     | 0%    | ~4.6 min     | Mean                                                                                                                          |
| Taylor et al. [72]     | 11 men<br>8 women | Runners and Triathletes                                       | -     | - | -     | -     | -     | 100%  | ~3 min       | Difference $\leq$ 2% between phases*                                                                                          |
| Weatherwax et al. [43] | 18 men<br>6 women | Elite endurance athletes                                      | -     | - | -     | -     | -     | 100%  | ~2.8 min     | Mean; difference $\leq$ 3% between phases*                                                                                    |
| Bhammar et al. [49]    | 9 boys<br>3 girls | Obese                                                         | 44.4% | - | 77.8% | 33.0% | -     | 22.0% | ~2.3 min     | Mean; validated when difference between measured phases' $\dot{V}O_2$ was lower than the predicted difference between phases. |
|                        | 5 boys<br>6 girls | Non-obese                                                     | 33.0% | - | 88.9% | 44.4% | -     | 44.4% | ~2.1 min     |                                                                                                                               |

$\dot{V}O_2$ , oxygen uptake;  $\dot{V}O_{2max}$ , maximal oxygen uptake; RER, respiratory exchange ratio; HR, heart rate; [LAC], blood lactate concentration; \* indicates that reliability measures such as typical error, coefficient of variation or intraclass correlation coefficient were provided. Note: whenever possible, authors were contacted to provide missing data.
